# Supplementary material for: High Yield of RNA Sequencing for Targetable Kinase Fusions in Lung Adenocarcinomas with No Mitogenic Driver Alteration Detected by DNA Sequencing and Low Tumor Mutation Burden
Source: Oxford University Press journal article supplement (doi:10.1158/1078-0432.ccr-19-0225), 2019-04-26
Supplement: 10780432ccr190225-sup-215717_2_supp_5452286_ppr3nh.docx [file 10780432ccr190225-sup-215717_2_supp_5452286_ppr3nh.docx]

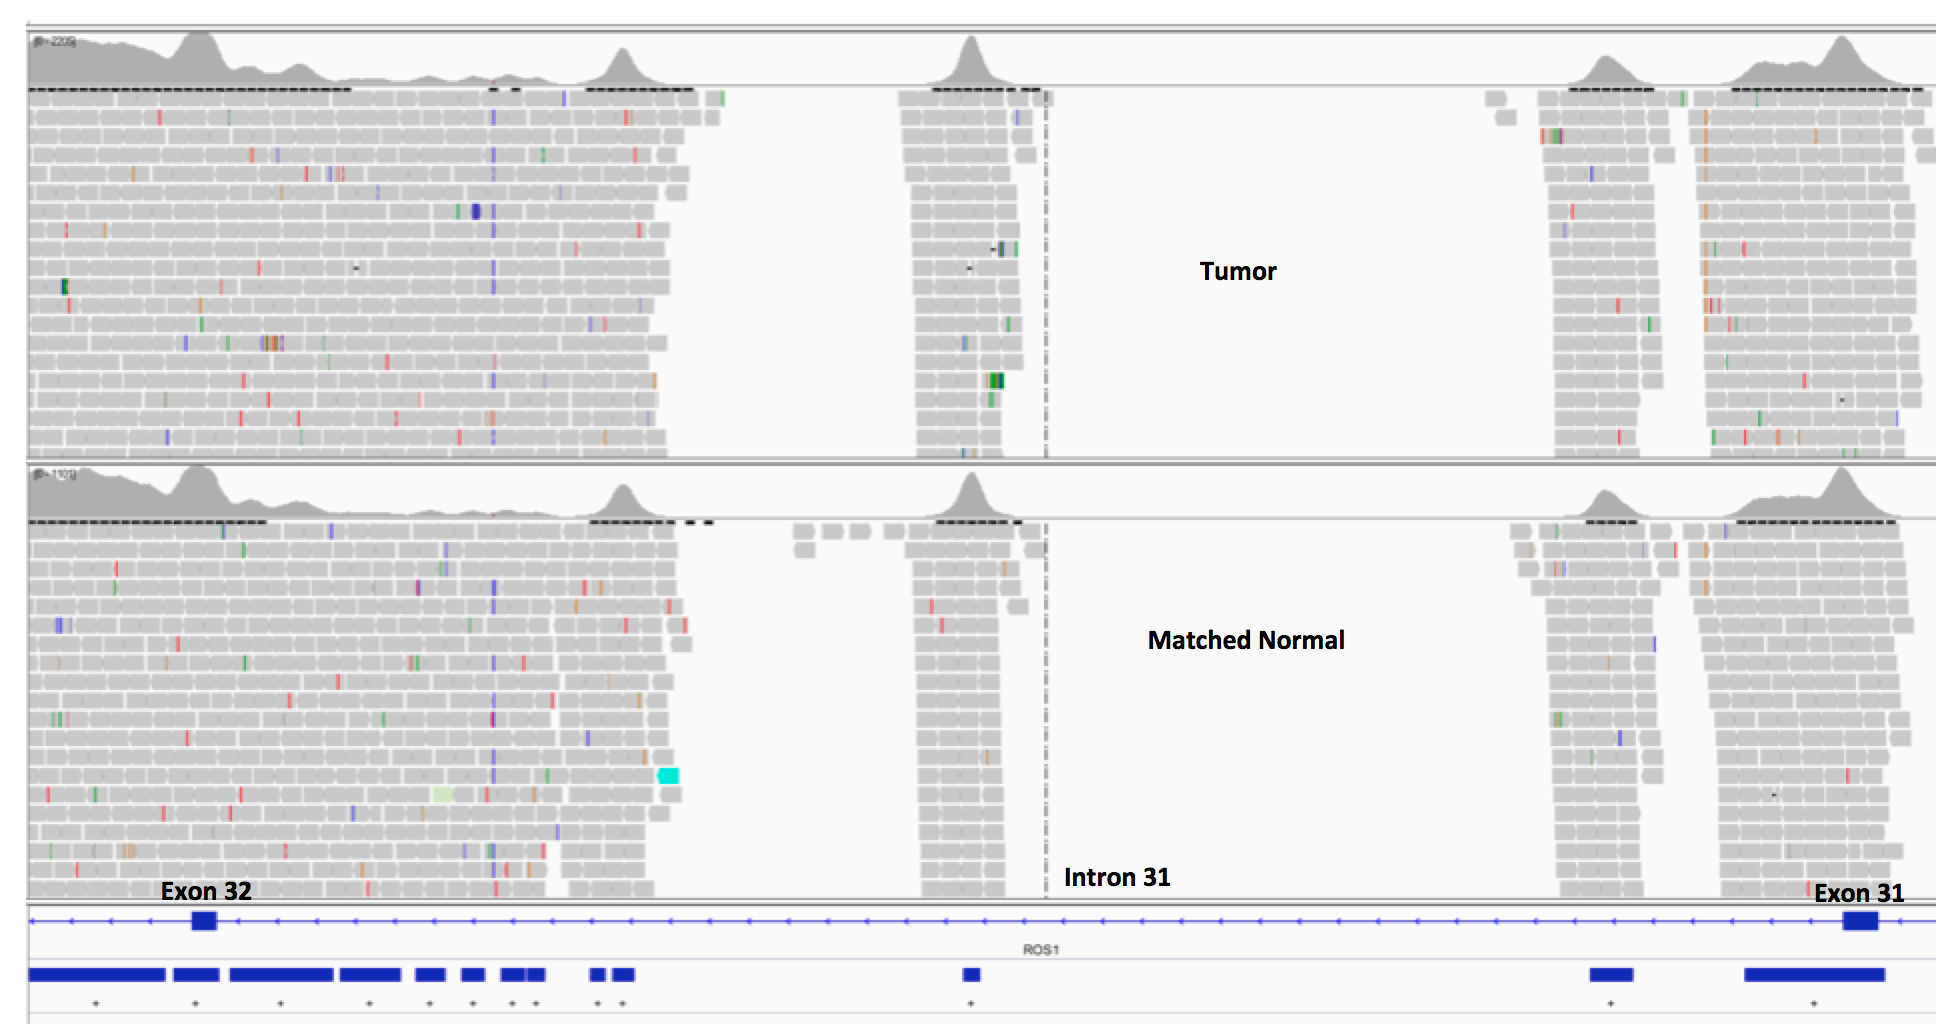


Supplementary Figure1. ***ROS1* Intron 31 coverage by DNASeq.** Horizontal gray bars indicate sequencing coverage as illustrated on Integrated Genomics Viewer (IGV). Horizontal bottom blue bars indicate MSK-IMPACT discontinuous probe tiling in intron 31 due to known repetitive elements (purple bars). Intronic regions without tiling probes lack sequencing coverage (as indicated by blank areas).


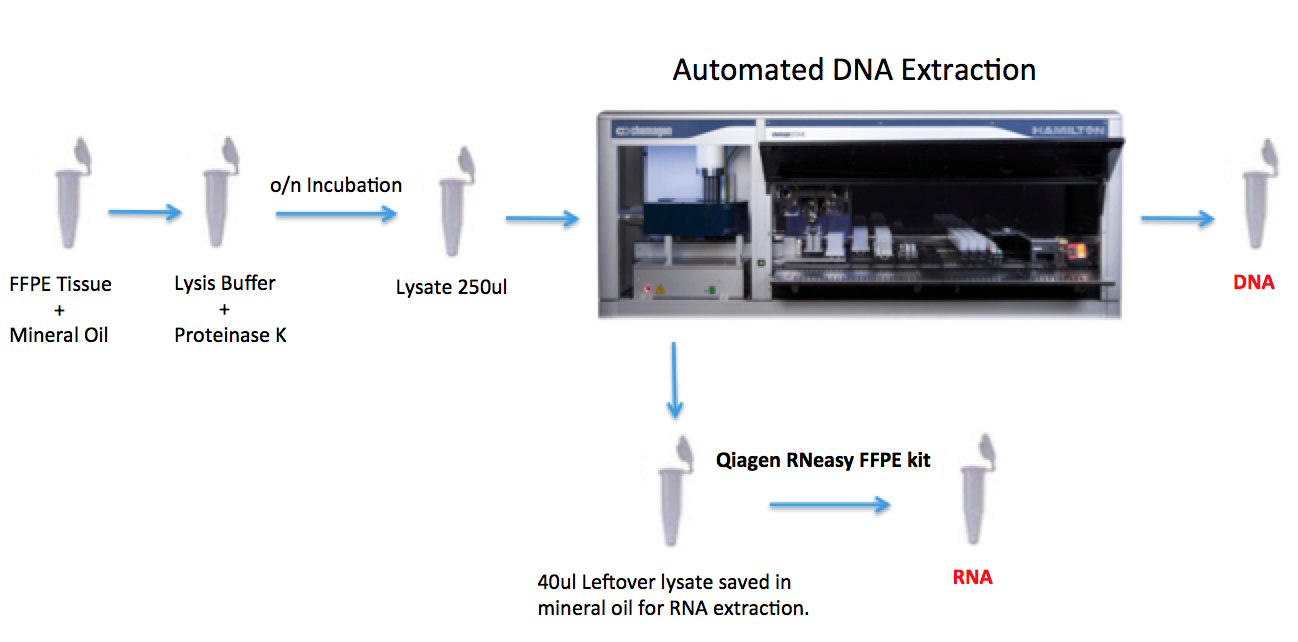


Supplementary Figure 2. **Access to adequate material for RNA extraction.** Simplifiedschematic description of the DNA extraction workflow from FFPE specimen submitted for MSK-IMPACT. Leftover lysate material from DNA extraction is saved at room temperature and used for RNA extraction whenever needed.
